# Supplementary material
Source: PubMed Central journal article supplement (PMC5860331)
Supplement: kww214rasmussen-torvikwebmaterialfinal.pdf [file kww214rasmussen-torvikwebmaterialfinal.pdf]

**Web Table 1.** Characteristics of the Study Population from CARDIA (Year 25 Visit, 2010–2011)

| Variable                                      | All   | White Males | White Females | Black Females | Black Males | P value <sup>a</sup> |
|-----------------------------------------------|-------|-------------|---------------|---------------|-------------|----------------------|
| N                                             | 3474  | 859         | 992           | 977           | 646         |                      |
| Male sex N                                    | 1505  |             |               |               |             |                      |
| Male sex %                                    | 43.3  |             |               |               |             |                      |
| African American race N                       | 1623  |             |               |               |             |                      |
| African American race %                       | 46.7  |             |               |               |             |                      |
| Age (years)                                   | 50.2  | 50.6        | 50.8          | 49.6          | 49.4        | <.0001               |
| BMI (kg/m <sup>2</sup> )                      | 30.2  | 28.8        | 28.1          | 33.3          | 30.4        | <.0001               |
| Left atrial volume Index (ml/m <sup>2</sup> ) | 24.6  | 24.7        | 23.7          | 24.9          | 25.5        | <.0001               |
| Septal e' (cm/s)                              | 9.3   | 9.2         | 9.8           | 9.1           | 8.7         | <.0001               |
| Lateral e' (cm/s)                             | 11.7  | 12.1        | 12.2          | 11.2          | 11.2        | <.0001               |
| E/A ratio                                     | 1.3   | 1.3         | 1.3           | 1.2           | 1.3         | <.0001               |
| E/e' ratio                                    | 9.0   | 8.4         | 8.7           | 9.7           | 9.2         | <.0001               |
| Deceleration time (ms)                        | 178.2 | 180.0       | 178.8         | 175.1         | 179.2       | .04                  |
| Peak E wave velocity (cm/sec)                 | 78.8  | 74.0        | 81.0          | 83.0          | 75.5        | <.0001               |
| Peak A wave velocity (cm/sec)                 | 63.9  | 57.5        | 64.6          | 70.3          | 61.5        | <.0001               |
| Height (cm)                                   | 170.3 | 178.1       | 164.8         | 164.2         | 177.5       | <.0001               |
| Weight (lb)                                   | 192.6 | 201.2       | 167.7         | 198.0         | 211.5       | <.0001               |
| Systolic blood pressure (mmHg)                | 118.7 | 118.2       | 111.6         | 122.3         | 124.6       | <.0001               |
| Diastolic blood pressure (mmHg)               | 73.9  | 73.0        | 68.2          | 77.2          | 77.4        | <.0001               |
| Pulse Pressure (mmHg)                         | 44.7  | 45.2        | 42.4          | 45.1          | 47.1        | <.0001               |
| Center (%)                                    |       |             |               |               |             | <.0001               |
| • Birmingham                                  | 23.6  | 22.0        | 17.5          | 27.2          | 29.2        |                      |
| • Chicago                                     | 22.8  | 24.1        | 22.6          | 23.5          | 20.1        |                      |
| • Minneapolis                                 | 26.4  | 32.1        | 31.7          | 18.7          | 22.3        |                      |
| • Oakland                                     | 27.3  | 21.7        | 28.2          | 30.5          | 28.3        |                      |
| BMI ≥30 kg/m <sup>2</sup> (%)                 | 43.6  | 34.4        | 31.8          | 62.8          | 45.0        | <.0001               |
| Hypertension (%)                              | 33.0  | 25.6        | 17.9          | 49.3          | 41.4        | <.0001               |

<sup>a</sup>For comparison of means or percentages across 4 subgroups, by ANOVA or chi-square test.
